1 **Detection and genetic analysis of infectious spleen and kidney necrosis virus (ISKNV) in**  
2 **ornamental fish from non-clinical cases: First report from India**

3

4 Sabyasachi Pattanayak, Anirban Paul, Pramoda Kumar Sahoo\*

5

6

7 National Referral Laboratory for Freshwater Fish Diseases

8 Fish Health Management Division

9 Central Institute of Freshwater Aquaculture

10 Kausalyaganga, Bhubaneswar 751002, India

11

12 \*Corresponding author:

13 Pramoda Kumar Sahoo

14 Central Institute of Freshwater Aquaculture, Kausalyaganga, Bhubaneswar 751002, India

15 Tel: +91 6742465421/Fax: +91 6742465407

16 Email: pksahoo1@hotmail.com

17

18 Running Head: First report of ISKNV from India

19

20

21

22

23

24 **Abstract**

25 Infectious spleen and kidney necrosis virus (ISKNV), a type species of the genus  
26 *Megalocytivirus*, poses a threat to ornamental fish trade as most cases show nonspecific  
27 symptoms, thus making timely diagnosis challenging. Apparently health molly (*Poecilia*  
28 *sphenops*) and angelfish (*Pterophyllum scalare*) collected from two distinct geographic  
29 localities of India were screened for four genera under *Iridoviridae*, *Megalocytivirus* i.e.,  
30 ISKNV, turbot reddish body iridovirus (TRBIV) and red seabream iridovirus (RSIV);  
31 ranaviruses and Singapore grouper iridovirus; and Lymphocystivirus through molecular  
32 approach. In total five numbers out of 17 samples (29.4%), ISKNV genome fragments were  
33 detected. A PCR assay using major capsid protein (MCP) gene was standardised to detect and  
34 differentiate infections within the *Megalocytivirus* genus, even without aid of sequencing.  
35 This forms the first report of ISKNV infection in ornamental fish from India. Sequence  
36 analysis of MCP gene showed that Indian isolate being 100% similar to the complete genome  
37 or reference strain of ISKNV. Phylogenetic reconstruction demonstrated the present strain  
38 belonging to ISKNV genotype I. Furthermore, structural stability of the MCP revealed this  
39 strain was more stable than ISKNV genotype II, RSIV and TRBIV at 25°C and pH 7.0. Thus  
40 a strong pan-India surveillance is recommended to reduce trade risk.

41

42 **Keywords:** ISKNV, Major capsid protein, Ornamental fish, PCR, Phylogeny

43

44

45

46

## 47        **1. Introduction**

48            Ornamental fish culture and trade is widely accepted as an industry showing  
49 enormous potential and aggressive growth worldwide. In India, its popularity has boomed in  
50 recent times owing to its economic benefits due to a large internal market and the substantial  
51 unexplored potential for exports. The major groups of farm-bred ornamental fish are goldfish,  
52 barbs, tetras, swordtails, mollies, gourami, guppies, angelfish, fighting fish and platyfish in  
53 India. The molly (*Poecilia latipinna*) and angelfish (*Pterophyllum scalare*) are two crucial  
54 ornamental fish species, equally attractive and vibrantly coloured species, both of which can  
55 be kept as pets in confined spaces like aquaria or garden pools (Kumari et al., 2017). The  
56 total export of ornamental fish from India stood at around 42 tonnes, grossly estimated to  
57 have a value of approximately 8.4 crores (US \$1.2 million) in 2017-18 alone (Singh, 2019).

58            On the flip side, the global ornamental fish trade poses a potential source for the  
59 spread of many exotic pathogens, particularly viruses causing both morbidity and mortality in  
60 fishes (Oyamatsu et al., 1997; George et al., 2015; Pragyan et al., 2019; Sahoo et al., 2016,  
61 2020a, 2020b). Similarly, Sahoo et al. (2020b) investigated the infectious diseases in  
62 freshwater aquaculture farms of eastern India and found that the incidences of viral infections  
63 are more in ornamental fish. To-date, viral infections viz., viral nervous necrosis (VNN) in  
64 freshwater aquarium fishes 'goldfish and rainbow shark' (Jithendran et al., 2011), Cyprinid  
65 herpes virus-2 (CyHV-2) in goldfish (Sahoo et al., 2016), carp edema virus (CEV) in koi carp  
66 (Swaminathan et al., 2016; Sahoo et al., 2020a), ranavirus in koicarp (George et al., 2015)  
67 and marine ornamental similar damselfish (Sivasankar et al., 2017) have been reported from  
68 Indian ornamental fishes.

69            The family *Iridoviridae* consists of a large group of enveloped viruses possessing  
70 double-stranded DNA (Jancovich, 2012), which are known to cause large scale mortalities in  
71 fish. Taxonomists have divided this family into five genera viz. *Megalocytivirus*, *Iridovirus*,

72 *Ranavirus*, *Lymphocystivirus* and *Chloriridovirus* (Kurita and Nakajima, 2012). Viruses  
73 belonging to the *Iridoviridae* family are typically vulnerable to both wild as well as  
74 freshwater fish, including ornamental fish. Iridoviruses capable of infecting fish have been  
75 accommodated in three major groups or genera  
76 viz., *Ranavirus*, *Lymphocystivirus* and *Megalocytivirus* (Chinchar et al., 2009). Since their  
77 discovery in the early 1990s, the group of Megalocytiviruses, in particular, have caused  
78 significant morbidity as well as financial losses in marine and freshwater fish culture,  
79 predominantly in Asia. Megalocytiviruses have been broadly distributed into three clusters,  
80 i.e., RSIV, infectious spleen and kidney necrosis virus (ISKNV) and turbot reddish body  
81 iridovirus (TRBIV), based on their major capsid protein (MCP) and ATPase gene  
82 phylogenetic analysis (Kurita and Nakajima, 2012), and recently another strain, threespine  
83 stickleback iridovirus (TSIV) have also been described (Murwantoko et al., 2018). He et al.  
84 (1998) first isolated ISKNV, a species of the genus *Megalocytivirus*, from mandarin fish in  
85 China. Subsequently ISKNV has also been reported from Japan (Tanaka et al., 2014),  
86 Malaysia (Subramaniam et al., 2014), Australia (Mohr et al., 2015), USA (Subramaniam et  
87 al., 2016), Germany (Jung-Schroers et al., 2016), Vietnam (Dong et al., 2017), Africa  
88 (Ramires et al., 2019) and Thailand (Thanasaksiri et al., 2019) in both freshwater and marine  
89 ornamental fishes. Phylogenetic analysis of the *Megalocytivirus* MCP gene sequence  
90 revealed the existence of two genotypes I and II of ISKNV (Kurita and Nakajima, 2012;  
91 Dong et al., 2017; Murwantoko et al., 2018).

92 Ornamental fish viruses have inherent inability to exhibit growth in commonly used  
93 fish cell lines, thus making diagnosis difficult. ISKNV like isolates, mostly those from  
94 freshwater ornamental fish, are challenging to culture *in vitro* (Kurita and Nakajima 2012,  
95 Rimmer et al., 2016) and CEV also being reported not to grow in any studied cell lines  
96 (Swaminathan et al., 2016). On multiple occasions, viral infection may remain latent until

97 adverse environmental conditions like poor quality of water, rough handling of fish, or  
98 overcrowding, activate the disease (Sahoo et al., 2016, 2020a). ISKNV poses a threat to  
99 ornamental fish trade because *Megalocytiviral* infections have non-specific symptoms, thus  
100 making timely diagnosis challenging (Jeong et al., 2006, 2008; Subramaniam et al., 2014;  
101 Zainathan et al., 2017) and persistence of sub-clinical detected level of virus at the retailer  
102 site (Rimmer et al., 2015). Viral diagnosis based on candidate gene PCR-sequencing seems to  
103 be more accurate, reliable and faster than traditional phenotypic methods. Despite different  
104 molecular techniques like PCR, nested PCR, real-time PCR (Xu et al., 2008), and LAMP  
105 assay (Suebsing et al., 2016) being used for detection of ISKNV, the specificity for ISKNV  
106 has usually been low (Razak et al., 2014; Bobby et a., 2018) thereby failing to reliably  
107 differentiate ISKNV from other subgroups of *Megalocytiviruses*, i.e. RSIV and TRBIV.  
108 Hence, the current investigation was aimed at detecting the presence of *Megalocytiviruses* in  
109 two species of ornamental fishes, i.e., molly (*Poecilia sphenops*) and angelfish (*Pterophyllum*  
110 *scalare*) collected from two geographically distinct Indian ornamental fish markets from  
111 apparently healthy fish. Further, we standardised a precise and reliable nested PCR-based  
112 approach to detect ISKNV and segregate it from other species of *Megalocytiviruses*.

113

## 114 **2. Materials and methods**

### 115 *2.1. Case history and sample collection*

116 Seventeen numbers of apparently healthy fish (Molly, *Poecilia sphenops* and  
117 angelfish, *Pterophyllum scalare*) were collected from five different ornamental retailer shops  
118 of Kurla, Maharashtra and Bhubaneswar, Odisha states of India during the year 2018-2019  
119 for routine screening of viruses in the National Referral Laboratory of Freshwater Fish  
120 Diseases at ICAR-Central Institute of Freshwater Aquaculture, Bhubaneswar, India. The fish  
121 were euthanized with overdose of MS222 (Sigma, USA), and liver, kidney, gills, brain and

122 eye samples of individual fish were collected in 100% ethanol. The experiments were  
123 performed following the approval of the Institute Animal Ethics Committee.

## 124 *2.2. Molecular screening for Megalocytiviruses*

### 125 *2.2.1. DNA isolation*

126 Tissue samples (~ 10 mg) were treated with proteinase K in lysis buffer (50 mM  
127 Tris/HCl, 100 mM NaCl, 100 mM EDTA, 1% [w/v] SDS, pH 8.0) and subjected to extraction  
128 with phenol/chloroform/isoamyl alcohol, followed by ethanol precipitation. The isolated  
129 DNA was diluted in TE (50 mM Tris/HCl, one mM EDTA, pH 7.5) buffer. Concentration  
130 and purity of the extracted DNA was determined by measuring OD at 260 and 280 nm using  
131 a NanoDrop ND1000 spectrophotometer (NanoDrop Technologies Inc., USA). The samples  
132 were stored at -20°C for further analysis. Before processing further, an equal amount of DNA  
133 samples from each organ of an individual fish were pooled to form one sample.

### 134 *2.2.2. PCR amplification*

135 PCR was performed using five sets of published oligonucleotide primers for  
136 confirmation of ISKNV (two nested PCRs based on MCP gene and one PCR based on  
137 ATPase gene). Samples were also PCR screened for RSIV, EHNV, SGIV and LCDV using  
138 published primers and conditions (Table 1).

139 The samples were initially screened for MCP gene of MCV using two sets of  
140 published primers (Rimmer et al., 2012). In the first set, C1105 and C1106 (Table 1) primers  
141 were used in a final volume of 25 µL containing 1 µL of total DNA, 1.5 µL (10 pmol) of each  
142 primer, 0.25 µL of *Taq* DNA polymerase (5 U/µL), 2.5 µL of 10X *Taq* buffer A, 0.5 µL of  
143 dNTPs (2 mM) and ddH<sub>2</sub>O to make final volume to 25 µL. The reaction mix was subjected to  
144 30 temperature cycles (30s at 94 °C, 30s at 55 °C and 1 min at 72 °C) after an initial

145 denaturing step (15 min at 95 °C) followed by a final extension step of 7 min at 72 °C in a  
146 Veriti thermal cycler (Applied Biosystem). A nested PCR was performed using a second set  
147 primers C1073 and C1074 using similar conditions. These primers only confirm the presence  
148 of MCV at genus level.

149 After confirming the presence of MCV, samples were processed for molecular  
150 screening of ISKNV using a combination of published primers (Kurita and Nakajima, 2012;  
151 Rimmer et al., 2012) with partial modification. In the first step, primer C1105F and MCP-  
152 uni1108-R8 (unpublished pairing) were used in a final volume of 25 µL containing 1 µL of  
153 total DNA, 1.5 µL (10 pmol) of each primer, 0.25 µL of *Taq* DNA polymerase (5 U/µL),  
154 2.5 µL of 10X *Taq* buffer A, 0.5 µL of dNTPs (2 mM) and ddH<sub>2</sub>O to make final volume to  
155 25 µL. The reaction mix was subjected to 35 temperature cycles (60 sec at 95 °C, 60 sec at 57  
156 °C and 60 sec at 72 °C) after an initial denaturing step (300 sec at 95 °C) followed by a final  
157 extension step of 300 sec at 72 °C in a Veriti thermal cycler to amplify genus MCV. Further,  
158 nested PCR was performed using ISKNV specific primers MCP-specI 465-F3 and MCP-  
159 specI 879-R3 using the above first step product to increase the sensitivity and specificity for  
160 detecting only ISKNV as primers don't amplify RSIV and TRBIV (Kurita and Nakajima,  
161 2012). The reaction mix was subjected to 35 temperature cycles (1 min at 95 °C, 1 min at 58  
162 °C and 1 min at 72 °C) after an initial denaturing step (5 min at 95 °C) followed by a final  
163 extension step of 5 min at 72 °C.

164 The samples were also screened for ISKNV ATPase gene (Mohr et al., 2015). PCR was  
165 carried out in a final volume of 25 µl reaction mix, as mentioned above for the MCP gene.  
166 Amplification was programmed for a preliminary 15 min denaturation step at 95 °C, followed  
167 by 30 cycles of denaturation at 94 °C for 30 s, annealing at 55 °C for 30 s, extension at 72 °C  
168 for 90 s, and finally extension at 72 °C for 7 min (Mohr et al., 2015). Several target

169 amplicons were generated to strengthen confirmation of ISKNV as it would be the first report  
170 from India.

### 171 *2.3. Sequencing and phylogenetic study*

172 The PCR amplicons (using primers C1105/C1106, C1073/C1074 and MCP-specI465-  
173 F3/MCP-specI879-R3 of MCP gene) from two positive samples were purified using  
174 QIAquick Gel Extraction kit, and purified products were commercially sequenced  
175 (AgriGenome Labs Pvt. Ltd, Kochi, India). The nucleotide sequences were analysed using  
176 the Basic Local Alignment Search Tool (BLAST) of NCBI (<http://www.ncbi.nlm.nih.gov>  
177 /blast) to find out the homology. The amino acid sequences of ISKNV MCP gene of different  
178 isolates were retrieved from the NCBI database and aligned with the amino acid sequences of  
179 Indian samples. Multiple alignments were performed with MEGA 6 by using the ClustalW  
180 algorithm (Tamura, 2013). Phylogenetic analysis of ISKNV MCP sequences was performed  
181 through Maximum Likelihood method available in MEGA 6, and the phylogenetic tree was  
182 constructed using the Maximum Likelihood method. The amino acid sequences of different  
183 Megalocytiviruses were aligned and differentiated with ISKNV. Meanwhile, the nucleic acid  
184 sequences of three subgroups of Megalocytivirus i.e., RSIV, ISKNV and TRBIV were  
185 aligned and compared.

### 186 *2.4. Protein stability prediction*

187 Along with the sequence study, I-MUTANT 2.0 server was used to predict the  
188 stability of the MCV major capsid protein sequences at pH 7.0 and temperature 25 °C  
189 (Capriotti et al., 2005). This software can evaluate the stability change upon single-site  
190 mutation, starting from the protein structure or the protein sequence. I-Mutant 2.0 correctly  
191 predicts whether the protein mutation stabilises or destabilises the protein when the protein  
192 sequence is available.



### 193 3. Results

#### 194 3.1. Identification of the virus in samples

195 Among seventeen samples screened, five numbers (29.4%) of samples were found to  
196 be positive for ISKNV. For detection of *Megalocytivirus*, MCP gene was screened using  
197 primers C1105/C1106 and C1073/C1074, and amplicons of 431 bp and 168 bp were obtained  
198 in first and second step PCRs, respectively (Figs. 1a and 1b). Aimed at detection of ISKNV,  
199 the tissues were screened with primers C1105/MCP-uni1108-R8 and MCP-specI465-  
200 F3/MCP-specI879-R3 primers. In five samples, amplified product of 415 bp of ISKNV MCP  
201 gene were obtained in the nested PCR (Fig. 2a). Further, in same samples ISKNV ATPase  
202 gene were also amplified with amplicon size of 1542 bp using ATP2DGf and  
203 ATP1076DGIVlater primers (Fig. 2b). All the samples collected for this study were found to  
204 be negative for RSIV, EHNV, SGIV and LCDV using respective primer sets.

#### 205 3.2. Sequencing, comparison of MCP gene and phylogenetic study

206 ISKNV MCP gene amplicons obtained (using primers pairs C1105/C1106 and MCP-  
207 specI465-F3/MCP-specI879-R3) were sequenced, and a BLAST search of the sequence  
208 revealed 99% and 100% similarities with known previously published MCP genes of  
209 *Megalocytivirus* and ISKNV, respectively. *Megalocytivirus* MCP gene (primer  
210 C1105/C1106) sequence amplicon of 431 bp encoding 143 amino acids has been submitted  
211 to GenBank (GenBank accession number: MK084827). The 431 bp MCP gene fragment was  
212 found to be 99.77% similar with the complete genome or reference strain of ISKNV  
213 (AF371960) along with other ISKNV isolates  
214 (MK757444, KX354220, KT781098, AB666344, AB666337, AF370008), as well as ISKNV  
215 like viruses i.e., giant seaperch iridovirus isolate GSIV (JF264350) and African lampeye  
216 iridovirus (AY285745, AB109368) (Kurita and Nakajima, 2012). Also, the obtained

217 sequence is 95.59% similar to RSIV (AB666327) and TRBIV (HM596017). Sequence  
218 alignment revealed a silent mutation observed at 399 bp position (GGCGly to GGTGly) in  
219 the MCP gene of Indian isolate (Fig. 3). Despite changes in the nucleotide sequence, the  
220 multiple 143 amino acid alignments of the MCP gene have shown 100% similarity with all  
221 the sequences mentioned (Fig. 4).

222 The amplicon of 415 bp, encoding 138 amino acids of MCP gene sequence was  
223 found to be specific for ISKNV. It has been subsequently submitted to GenBank (GenBank  
224 accession number: MN518863). Both of these gene fragments (first 431 bp specific  
225 for *Megalocytivirus*, and next 415 bp specific for ISKNV) were combined to form a total of  
226 846 nucleotides and 282 amino acids (Figs. 3, 4). The primer binding sites  
227 of *Megalocytivirus* specific primer C1105/C1106 and C1073/C1074 are common in the MCP  
228 gene of ISKNV, RSIV and TRBIV. To increase the sensitivity and confirmative diagnosis of  
229 ISKNV, the nested PCR using ISKNV specific MCP-specI465-F3 and MCP-specI879-R3  
230 primer pair was successfully performed, that could differentiate ISKNV from the other  
231 *Megalocytivirus* species by amplifying only ISKNV (415 bp). Further the diagnosis was more  
232 validated based on *in silico* analysis for all three *Megalocytivirus* sequence primer binding  
233 regions in this study and also based on earlier report of Kurita and Nakajima (2012) and  
234 Mohr et al. (2015) (Fig. 3).

235 A phylogeny tree was constructed based on the MCP gene amino acid sequence  
236 (MK084827). The Indian isolate in the present study was found to be ISKNV genotype I. It  
237 showed 100% MCP gene sequence similarity with that of China  
238 (MK757444, AF370008, ADU25256), Australia (ALF95980, KP292960), Malaysia  
239 (JQ253373, KF753331), Singapore (AB666344, BAL04525), and Thailand (BBD52180,  
240 LC378578.1), and was clustered within the same clade in the phylogeny tree (Fig. 5). There  
241 were variations at the positions corresponding to amino acids 84 (Asn-Asp) and 198 (Leu-

242 Pro) in the MCP sequences of South Korea (GU168574) and Malaysia (JQ253374),  
243 respectively (Fig. 4). Even so, the later two strains clustered with the Indian strain within the  
244 same clade of ISKNV genotype I (Fig. 5). Meanwhile, two other isolates of ISKNV, i.e.,  
245 Japan (AB669096) and China (KY440040) differed from other ISKNV at amino acid position  
246 203 (Asn- Ser) and were found to have clustered together as ISKNV genotype II (Figs. 4, 5).  
247 The two subspecies of Megalocytivirus, i.e., RSIV (AB666327) and TRBIV (AY590687)  
248 were segregated from ISKNV by amino acid position 146 (Ala-Gly), 157 (Val-Ala),  
249 167 (Ala-Val) and 143 (Asp-Gly), 146 (Ala-Ser), 152 (Gln-His), 157 (Val-Thr), and  
250 218 (Gla-Ser), respectively, and clustered at different clades (Figs. 4, 5).

### 251 3.3. Prediction of protein stability of MCP

252 The stability of the MCP of ISKNV of Indian strain was compared *in silico* with  
253 ISKNV, RSIV and TRBIV isolates using I-Mutant software. The stability of MCP was found  
254 to reduce due to amino acid changes in ISKNV isolates of South Korea (84; N-D, 246; Q-R),  
255 Malaysia (198; L-P), Japan and China (Genotype II) (203; N-S) (Supplementary Fig. 1).  
256 MCP stability study indicated ISKNV MCP of having relatively better structural stability as  
257 compared to that of RSIV, whereas TRBIV MCP showed further decreased stability at 25°C  
258 and pH 7.0 (Supplementary Fig. 2).

## 259 4. Discussion

260 To our knowledge, it seems to be the first report of ISKNV infection in traded  
261 ornamental fish in India. The study further highlights a new combinational primer set to  
262 undertake a nested PCR (using C1105F/ MCP-uni1108-R8 and its nested MCP-specI465-F3  
263 and MCP-specI879-R3) to directly identify ISKNV in PCR without ambiguity in one go,  
264 thereby delineating needs for further immediate need of sequence confirmation. Further, an  
265 increase in the sensitivity and specificity of only ISKNV-specific primer set published earlier

266 (Kurita and Nakajima, 2012) was obtained to detect the virus in sub-clinical cases. This study  
267 simultaneously shows that use of primers (C1105/C1106) to screen ISKNV may not  
268 distinguish ISKNV from genus *Megalocytivirus* without the aid of sequencing.

269 The hosts affected by ISKNV are relatively wide-ranging; nevertheless, freshwater  
270 fish species are the predominantly affected species (Kurita and Nakajima, 2012; Sihu et al.,  
271 2017). Several outbreaks of ISKNV diseases in freshwater fishes have been reported in the  
272 ornamental fish of Germany (Jung-Schroers et al. 2016), Australia (Mohr et al. 2015; Rimmer  
273 et al. 2017), and Malaysia (Subramaniam et al. 2014; Zainathan et al. 2017) and more  
274 recently in Africa (Ramirez-Paredes et al., 2019). Detection of ISKNV in two ornamental fish  
275 species, molly (*P. sphenops*) and angelfish (*P. scalare*) obtained in this study were also  
276 reported earlier from other countries (Rodger et al., 1997; Rodger et al., 2003; Yanong and  
277 Waltzek, 2010; Go et al., 2016; Zainathan et al., 2017). Subramaniam et al. (2014) reported  
278 many positive cases of ISKNV in ornamental fishes which did not show any clinical signs.  
279 This further confirmed the fact that *Megalocytivirus* infects visibly healthy fish species; this  
280 condition could be termed persistent or asymptomatic infection as reported by Jeong et al.  
281 (2006, 2008). In comparison to clinically infected fish tissue, DNA concentration  
282 of *Megalocytivirus* was approximately  $10^5$  times higher in asymptomatic fish, as proven by  
283 (Jeong et al., 2006). An earlier report finds the presence of ISKNV from apparently healthy  
284 fish at temperatures below 20 °C (He et al., 2002). When water temperature was 28 °C,  
285 juvenile Chinese perch challenged with ISKNV, displayed clinical signs with 100% mortality  
286 (He et al., 2000). It seems *Megalocytivirus* requires high temperature to multiply (Liu et al.,  
287 2019) that needs further study after isolation of virus. Further, recent report of emergence in  
288 causing mass mortality in tilapia in Africa raise a big concern for tilapia farming (Ramirez-  
289 Paredes et al., 2019), if not taken proper care, likely entry of it from ornamental fish to tilapia  
290 species would be disastrous.

291           Currently, the OIE Manual for Diagnostic Tests for Aquatic Animals does not identify  
292 a single test that would be suitable for accurate and specific detection of ISKNV (Kurita and  
293 Nakajima, 2012; OIE, 2018) . Out of the recommended criteria for confirmatory diagnosis,  
294 conventional PCR detects the two listed genotypes, whereas others require specialized  
295 reagents (monoclonal antibodies) or are not applicable to all ISKNV like isolates (eg. virus  
296 isolation) (Johnson et al., 2019). Better methods remain to be identified for the specific  
297 diagnosis of ISKNV infections with particular reference to the differentiation of gene  
298 sequence, subclinical infections and clinical disease. Although there are several reports of  
299 screening the ISKNV virus by PCR and sequencing using a *Megalocytivirus* genus primer  
300 (C1105/C1106), no reports of detection for ISKNV by using ISKNV species specific primer  
301 described by Kurita and Nakajima (2012) and Mohr et al. (2015) (Go et al., 2006; Xu et al.,  
302 2008; Rimmer et al., 2012; Subramaniam et al., 2014; Razak et al., 2014; Mohr et al., 2015;  
303 Rimmer et al., 2017; Dong et al., 2017; Bobby et a., 2018; Johnson et al., 2019; Zainathan et  
304 al., 2019). Hence in this investigation, a nested PCR assay was standardised to detect and  
305 differentiate ISKNV infections within the *Megalocytivirus* genus of the family *Iridoviridae*.

306           The major capsid protein (MCP) gene is relatively conserved among the viruses of the  
307 family *Iridoviridae*, for which it can be considered as one of the most important genes for the  
308 analysis of the genetic relationships among this family (Williams et al., 1996; Tidona et al.,  
309 1998; Liu et al., 2019). The amino acid sequence analysis of *Megalocytivirus* specific MCP  
310 gene regions revealed 100% similarity with all the three *Megalocytivirus* subgroup.  
311 However, subgrouping issue was resolved by use of new combinational nested ISKNV PCR  
312 with internal primer set of ISKNV (Kurita and Nakajima, 2012), as it is 100% similar with  
313 only ISKNV genome was obtained with the produced amplicons, that emphasizes upon  
314 ISKNV subtyping with the current PCR system in one go.

315 ISKNV viruses can be further divided into two sub-clusters: genotypes I and II  
316 (Rimmer et al., 2012; Dong et al., 2017). Phylogenetic analysis revealed that the Indian  
317 isolate belonged to genotype I, which was more closely related to ISKNV isolates of China  
318 (MK757444, AF370008, ADU25256), Australia (ALF95980, KP292960), Malaysia  
319 (JQ253373, KF753331), Singapore (AB666344, BAL04525), and Thailand (BBD52180,  
320 LC378578.1), thus forming a single cluster. This isolate formed a different cluster with Japan  
321 (AB669096) and China (KY440040) isolates which belonged to ISKNV genotype II (Dong et  
322 al., 2017).

323 A proteomic study of ISKNV demonstrated that ISKNV virions possess 38 viral  
324 structural proteins, where MCP is the main structural component of the virus particle,  
325 comprising 40 to 45% of the total particle polypeptide (Dong et al., 2011; Jia et al., 2013).  
326 Jia et al. (2013) reported first time, ISKNV MCP interacted with Mandarin fish caveolin  
327 1 (mCav-1), which gives an evidence of a viral structural protein interacted with a host  
328 protein in the family *Iridoviridae* for its primary infection. This information indicates that,  
329 major capsid proteins play an essential role in the ISKNV infection by virus-host protein  
330 interactions. Further study can help us to understand the mechanisms of viral pathogenicity,  
331 which may be related to the structural proteins and virus-induced immunological responses.  
332 Keeping in view of the above study, we investigated structural stability of the MCP of  
333 ISKNV, RSIV and TRBIV using I-Mutant software, and it was found that the ISKNV is more  
334 stable at 25°C and pH 7.0. Among different ISKNV isolates, Indian isolate along with similar  
335 MCP sequence isolates were found more structurally stable. Furthermore, ISKNV genotype I  
336 (Indian isolate) of MCP was found to be having more structural stability than ISKNV  
337 genotype II. This study suggests that ISKNV genotype I might be more virulent, but further  
338 investigation is needed to establish its probable role in influencing viral pathogenicity at  
339 different water temperatures or stressors.

340 To summarize, it seems to be the first report of ISKNV from ornamental fish meant  
341 for either internal or external trade. The current investigation also established an improved  
342 molecular diagnostic tool for detection of ISKNV pending sequencing confirmation, even  
343 from sub-clinical cases. Given the promiscuous nature of Megalocytiviruses, a strict  
344 biosecurity seems to be essential for its further spread to cultured fish species and also  
345 equally important to go for pan-India surveillance for this virus.

#### 346 **Conflict of interests**

347 There is no conflict of interests involved in this manuscript.

#### 348 **Acknowledgements**

349 The authors wish to thank the Director, ICAR-Central Institute of Freshwater Aquaculture,  
350 Kausalyaganga, Bhubaneswar, India for providing necessary facilities during this study.  
351 Funding support form Department of Biotechnology, New Delhi is duly acknowledged.

#### 352 **Data availability statement**

353

354 The data that supports the findings of this study are available in the supplementary material  
355 of this article (supplementary Figs. 1 and 2).

356

#### 357 **References**

358 Bermúdez, R., Losada, A.P., de Azevedo, A.M., Guerra-Varela, J., Pérez-Fernández, D.,  
359 Sánchez, L., Padrós, F., Nowak, B., Quiroga, M.I., 2018. First description of a  
360 natural infection with spleen and kidney necrosis virus in zebrafish. *J. Fish Dis.* 41,  
361 1283-1294.

- 362 Bobby, G., Hong, T.K., Addis, S.N.K., Wahid, M.E.A., Sung, Y.Y., Zainathan, S.C., 2018.  
363 First detection of Megalocytivirus in oysters (*Crassostrea iredalei*) from Marudu Bay,  
364 Sabah, Malaysia. *Aquacult. Aquarium Conserv. Legis.* 11, 1537-1547.
- 365 Capriotti, E., Fariselli, P., Casadio, R., 2005. I-Mutant 2.0., Predicting stability changes upon  
366 mutation from the protein sequence or structure. *Nucleic Acids Res.* [Online], 33  
367 (Web Server issue), W306-310.
- 368 Chinchar, V.G., Hyatt, A., Miyazaki, T., Williams, T., 2009. Family Iridoviridae: poor viral  
369 relations no longer. *Curr. Top. Microbiol. Immunol.* 328, 123–170.
- 370 Dong, C.F., Xiong, X.P., Shuang, F., Weng, S.P., Zhang, J., Zhang, Y., Luo, Y.W., He, J.G.,  
371 2011. Global landscape of structural proteins of infectious spleen and kidney necrosis  
372 virus. *J. Virol.* 85, 2869 –2877.
- 373 Dong, H.T., Jitrakorn, S., Kayansamruaj, P., Pirarat, N., Rodkhum, C., Rattanarojpong, T.,  
374 Senapin, S., Saksmerprome, V., 2017. Infectious spleen and kidney necrosis disease  
375 (ISKND) outbreaks in farmed barramundi (*Lates calcarifer*) in Vietnam. *Fish*  
376 *Shellfish Immunol.* 68, 65-73.
- 377 George, M.R., John, K.R., Mansoor, M.M., Saravanakumar, R., Sundar, P., Pradeep, V.,  
378 2015. Isolation and characterization of a ranavirus from koi, *Cyprinus carpio* L.,  
379 experiencing mass mortalities in India. *J. Fish Dis.* 38, 389-403.
- 380 Go, J., Lancaster, M., Deece, K., Dhungyel, O., Whittington, R., 2006. The molecular  
381 epidemiology of iridovirus in Murray cod (*Maccullochella peelii peelii*) and dwarf  
382 gourami (*Colisa lalia*) from distant biogeographical regions suggests a link between  
383 trade in ornamental fish and emerging iridoviral diseases. *Mol. Cell. Probes.* 20, 212-  
384 222.



- 385 Go, J., Waltzek, T.B., Subramaniam, K., Yun, S.C., Groff, J.M., Anderson, I.G., Chong, R.,  
386 Shirley, I., Schuh, J.C.L., Handler, J.H., Tweedie, A., 2016. Detection of  
387 infectious spleen and kidney necrosis virus (ISKNV) and turbot reddish body  
388 iridovirus (TRBIV) from archival ornamental fish samples. *Dis. Aquat. Org.* 122,  
389 105-123.
- 390 He, J.G., Zeng, K., Weng, S.P., Chan, S.M., 2000. Systemic disease caused by an iridovirus-  
391 like agent in cultured mandarin fish *Siniperca chuatsi* (Basiliewsky), in China. *J. Fish*  
392 *Dis.* 23, 219–222.
- 393 He, J.G., Zeng, K., Weng, S.P., Chan, S.M., 2002. Experimental transmission, pathogenicity  
394 and physical–chemical properties of infectious spleen and kidney necrosis virus  
395 (ISKNV). *Aquaculture* 204, 11-24.
- 396 Holopainen, R., Ohlemeyer, S., Schütze, H., Bergmann, S.M., Tapiovaara, H., 2009.  
397 Ranavirus phylogeny and differentiation based on major capsid protein, DNA  
398 polymerase and neurofilament triplet H1-like protein genes. *Dis. Aquat. Org.* 85, 81-  
399 91.
- 400 Iwamoto, R., Hasegawa, O., LaPatra, S., Yoshimizu, M., 2002. Isolation and characterization  
401 of the Japanese flounder (*Paralichthys olivaceus*) lymphocystis disease virus. *J.*  
402 *Aquat. Anim. Health* 14, 114-123.
- 403 Jancovich, J.K., 2012. Family iridoviridae. *Virus taxonomy: ninth report of the international*  
404 *committee on taxonomy of viruses*, 193-210.
- 405 Jeong, H.D., Lyu, J.H., Jeong, J.B., Kim, H.Y., Jun, L.J., Cho, H.J., Lee, J.W., 2006.  
406 Detection and distribution of iridoviruses in five freshwater ornamental fish  
407 species. *J. Fish Dis.* 19, 197-206.

- 408 Jeong, J.B., Kim, H.Y., Jun, L.J., Lyu, J.H., Park, N.G., Kim, J.K., Do Jeong,H., 2008.  
409 Outbreaks and risks of infectious spleen and kidney necrosis virus disease in  
410 freshwater ornamental fishes. *Dis. Aquat. Org.* 78, 209-215.
- 411 Jia, K.T., Wu, Y.Y., Liu, Z.Y., Mi, S., Zheng, Y.W., He, J., Weng, S.P., Li, S.C., He, J.G.,  
412 Guo, C.J., 2013. Mandarin fish caveolin 1 interaction with major capsid protein of  
413 infectious spleen and kidney necrosis virus and its role in early stages of infection. *J.*  
414 *Virolog.* 87, 3027-3038.
- 415 Jithendran, K.P., Shekhar, M.S., Kannappan, S., Azad, I.S., 2011. Nodavirus infection in  
416 freshwater ornamental fishes in India: diagnostic histopathology and nested RT-  
417 PCR. *Asian Fish. Sci.* 24, 12-19.
- 418 Johnson, S.J., Hick, P.M., Robinson, A.P., Rimmer, A.E., Tweedie, A., Becker, J.A., 2019.  
419 The impact of pooling samples on surveillance sensitivity for the megalocytivirus,  
420 Infectious spleen and kidney necrosis virus. *Transbound. Emerg. Dis.* 66, 2318-2328.
- 421 Jung-Schroers, V., Adamek, M., Wohlsein, P., Wolter, J., Wedekind, H., Steinhagen, D.,  
422 2016. First outbreak of an infection with infectious spleen and kidney necrosis virus  
423 (ISKNV) in ornamental fish in Germany. *Dis. Aquat. Org.* 119, 239-244.
- 424 Kumari, A., Kumar, S., Kumar, A., 2017. Study of life compatibility and growth of selected  
425 ornamental fishes under aquarium in Sanjay Gandhi Biological Park. *Int. J. Curr.*  
426 *Microbiol. App. Sci.* 6, 3166-3172.
- 427 Kurita, J., Nakajima, K., 2012. Megalocytiviruses. *Viruses* 4, 521–538.
- 428 Kurita, J., Nakajima, K., Hirono, I., Aoki, T., 1998. Polymerase chain reaction (PCR)  
429 amplification of DNA of red seabream iridovirus (RSIV). *Fish Pathol.* 33, 17–23.
- 430 Liu, L., Yu, L., Fu, X., Lin, Q., Liang, H., Niu, Y., Li, N., 2019. First report of  
431 megalocytivirus (*Iridoviridae*) in cultured bluegill sunfish, *Lepomis macrochirus*, in  
432 China. *Microb. Pathog.* 135, 103617.

- 433 Mohr, P.G., Moody, N.J., Williams, L.M., Hoad, J., Cummins, D.M., Davies, K.R., Crane,  
434 M.S., 2015. Molecular confirmation of infectious spleen and kidney necrosis virus  
435 (ISKNV) in farmed and imported ornamental fish in Australia. *Dis. Aquat. Org.* 116,  
436 103-110.
- 437 Murwantoko, Sari, D.W.K., Handayani, C.R., Whittington, R.J., 2018. Genotype  
438 determination of megalocytivirus from Indonesian marine fishes. *Biodiversitas* 19,  
439 1730-1736.
- 440 OIE (World Organisation for Animal Health) (2018). *Aquatic Animal Health Code*, 21st edn.  
441 OIE, Paris.
- 442 Oyamatsu T., Matoyama, H., Yamamoto, K., Fukuda, H., 1997. A trial for detection of carp  
443 edema virus by using polymerase chain reaction. *Aqua. Sci.* 45, 247–251.
- 444 Pragyana, D., Bajpai, V., Suman, K., Mohanty, J., Sahoo, P.K., 2019. A review of current  
445 understanding on carp edema virus (CEV): A threatful entity in disguise. *Int. J. Fish.*  
446 *Aquat. Stud.* 7, 87-93.
- 447 Ramires, G., Paley, R.K., Hunt, W., Feist, S.W., Stone, D.M., Field, T., Hayden, D., Ziddah,  
448 P.A., Duodu, S., Wallis, T., Verner-Jeffreys, D., 2019. First detection of infectious  
449 spleen and kidney necrosis virus (ISKNV) associated with massive mortalities in  
450 farmed tilapia in Africa. *bioRxiv* 680538, (doi: <https://doi.org/10.1101/680538>).
- 451 Razak, A.A., Ransangan, J., Sade, A., 2014. First report of Megalocytivirus (Iridoviridae) in  
452 grouper culture in Sabah, Malaysia. *Int. J. Curr. Micro. Ap. Sc.* 3, 896-909.
- 453 Rimmer, A.E., Becker, J.A., Tweedie, A., Lintermans, M., Landos, M., Stephens, F.,  
454 Whittington, R.J., 2015. Detection of dwarf gourami iridovirus (infectious spleen and  
455 kidney necrosis virus) in populations of ornamental fish prior to and after importation  
456 into Australia, with the first evidence of infection in domestically farmed *Platy*  
457 (*Xiphophorus maculatus*). *Prev. Vet. Med.* 122, 181-194.

- 458 Rimmer, A.E., Becker, J.A., Tweedie, A., Whittington, R.J., 2012. Development of a  
459 quantitative polymerase chain reaction (qPCR) assay for the detection of dwarf  
460 gourami iridovirus (DGIV) and other megalocytiviruses and comparison with the  
461 Office International des Epizooties (OIE) reference PCR protocol. *Aquaculture* 358,  
462 155-163.
- 463 Rimmer, A.E., Whittington, R.J., Tweedie, A., Becker, J.A., 2016. Susceptibility of a number  
464 of Australian freshwater fishes to dwarf gourami iridovirus (infectious spleen and  
465 kidney necrosis virus). *J. Fish Dis.* 40, 293-310.
- 466 Rodger, H.D., Kobs, M., Macartney, A., Frerichs, G.N., 1997. Systemic iridovirus infection  
467 in freshwater angelfish, *Pterophyllum scalare* (Lichtenstein). *J. Fish Dis.* 20, 69-72.
- 468 Sahoo, P.K., Pattanayak, S., Paul, A., Sahoo, M.K., Rajesh Kumar, P., 2020a. Carp edema  
469 virus in ornamental fish farming in India: A potential threat to koi carps but not to co-  
470 cultured Indian major carp or goldfish. *Indian J. Exp. Biol.* 58, 254-262.
- 471 Sahoo, P.K., Paul, A., Sahoo, M.K., Pattanayak, S., Rajesh Kumar, P., Das, B.K., 2020b.  
472 Incidences of infectious diseases in freshwater aquaculture farms of eastern India: a  
473 passive surveillance based study from 2014-2018. *J. Aquac. Res. Dev.* 11, 1-5.
- 474 Sahoo, P.K., Swaminathan, T.R., Abraham, T.J., Kumar, R., Pattanayak, S., Mohapatra, A.,  
475 Rath, S.S., Patra, A., Adikesavalu, H., Sood, N., Pradhan, P.K., 2016. Detection of  
476 goldfish haematopoietic necrosis herpes virus (Cyprinid herpesvirus-2) with multi-  
477 drug resistant *Aeromonas hydrophila* infection in goldfish: First evidence of any  
478 viral disease outbreak in ornamental freshwater aquaculture farms in India. *Acta*  
479 *Trop.* 161, 8-17.
- 480 Shiu, J.Y., Hong, J.R., Ku, C.C., Wen, C.M., 2018. Complete genome sequence and  
481 phylogenetic analysis of megalocytivirus RSIV-Ku: A natural recombination  
482 infectious spleen and kidney necrosis virus. *Arch. Virol.* 163, 1037-1042.

- 483 Singh, G., 2019. Pretty lucrative – India’s surge in ornamental fish farming. The Fish Site,  
484 5m.
- 485 Sivasankar, P., John, K.R., George, M.R., Mageshkumar, P., Manzoor, M.M., Jeyaseelan,  
486 M.P., 2017. Characterization of a virulent ranavirus isolated from marine ornamental  
487 fish in India. *Virus Dis.* 28, 373-382.
- 488 Subramaniam, K., Gotesman, M., Smith, C.E., Steckler, N.K., Kelley, K.L., Groff, J.M.,  
489 Waltzek, T.B., 2016. Megalocytivirus infection in cultured Nile tilapia *Oreochromis*  
490 *niloticus*. *Dis. Aquat. Org.* 119, 253-258.
- 491 Subramaniam, K., Shariff, M., Omar, A.R., Hair-Bejo, M., Ong, B.L., 2014. Detection and  
492 molecular characterization of infectious spleen and kidney necrosis virus from major  
493 ornamental fish breeding states in Peninsular Malaysia. *J. Fish Dis.* 37, 609-618.
- 494 Suebsing, R., Pradeep, P.J., Jitrakorn, S., Sirithammajak, S., Kampeera, J., Turner, W.A.,  
495 Saksmerprome, V., Withyachumnarnkul, B., Kiatpathomchai, W., 2016. Detection  
496 of natural infection of infectious spleen and kidney necrosis virus in farmed tilapia  
497 by hydroxynaphthol blue-loop-mediated isothermal amplification assay. *J. Appl.*  
498 *Microbiol.* 121(1), 55-67.
- 499 Swaminathan, T.R., Kumar, R., Dharmaratnam, A., Basheer, V.S., Sood, N., Pradhan, P.K.,  
500 Sanil, N.K., Vijayagopal, P., Jena, J.K., 2016. Emergence of carp edema virus in  
501 cultured ornamental koi carp, *Cyprinus carpio koi*, in India. *J. Gen. Virol.* 97, 3392-  
502 3399.
- 503 Tamura, K., Stecher, G., Peterson, D., Filipski, A., Kumar, S., 2013. MEGA6: molecular  
504 evolutionary genetics analysis version 6.0. *Mol. Biol. Evo.* 30, 2725.
- 505 Tanaka, N., Izawa, T., Kuwamura, M., Higashiguchi, N., Kezuka, C., Kurata, O., Wada, S.,  
506 Yamate, J., 2014. The first case of infectious spleen and kidney necrosis virus

507 (ISKNV) infection in aquarium-maintained mandarin fish, *Siniperca chuatsi*  
508 (Basilewsky), in Japan. J. Fish Dis. 37, 401-405.

509 Thanasaksiri, K., Takano, R., Fukuda, K., Chaweepack, T., Wongtavatchai, J., 2019.  
510 Identification of infectious spleen and kidney necrosis virus from farmed barramundi  
511 *Lates calcarifer* in Thailand and study of its pathogenicity. Aquaculture 500, 188-  
512 191.

513 Tidona, C.A., Schnitzler, P., Kehm, R., Darai, G., 1998. Is the major capsid protein of  
514 iridoviruses a suitable target for the study of viral evolution? Virus Gene 16, 59–66.

515 Williams, T., 1996. The Iridoviruses. Adv. Virus Res. 46, 345–412.

516 Xu, X., Zhang, L., Weng, S., Huang, Z., Lu, J., Lan, D., Zhong, X., Yu, X., Xu, A., He, J.,  
517 2008. A zebrafish (*Danio rerio*) model of infectious spleen and kidney necrosis virus  
518 (ISKNV) infection. Virology 376, 1-12.

519 Yanong, R.P., Waltzek, T.B., 2010. Megalocytivirus infections in fish, with emphasis on  
520 ornamental species. Program in Fisheries and Aquatic Sciences (FA182), University  
521 of Florida, 1-7.

522 Zainathan, S.C., Balaraman, D., Ambalavanan, L., Moorthy, P.K., Palakrishnan, S.K., Ariff,  
523 N., 2019. Molecular screening of infectious spleen and kidney necrosis virus in four  
524 species of Malaysian farmed ornamental fish. Malays. Appl. Biol. 48, 131–138.

525 Zainathan, S.C., Johan, C.A.C., Subramaniam, N., Ahmad, A.A., Halim, N.I.A., Norizan, N.,  
526 2017. Detection and molecular characterization of Megalocytivirus strain ISKNV in  
527 freshwater ornamental fish from Southern Malaysia. AACL Bioflux. 10, 1098-1109.

528  
529  
530  
531  
532

533

534 Table 1 Details of the primers used in this study with expected size of amplicons

| Sl No | Virus/target gene             | Primer            | Nucleotide base sequence (5'-3') | Amplicon size (bp) | Reference               |
|-------|-------------------------------|-------------------|----------------------------------|--------------------|-------------------------|
| 1     | Megalocytivirus nPCR MCP gene | C1105             | GGG TTCATCGACATCTCCGCG           | 430                | Rimmer et al., 2012     |
|       |                               | C1106             | AGGTCGCTGCGCATGCCAATC            |                    |                         |
|       |                               | C1173             | AATGCCGTGACCTACTTTGC             | 167                |                         |
|       |                               | C1174             | GATCTTAACACGCAGCCACA             |                    |                         |
| 2     | ISKNV nPCR MCP gene           | C1105             | GGG TTCATCGACATCTCCGCG           | 1075               | Current Study           |
|       |                               | MCP-uni1108-R8    | TCTCAGGCATGCTGGGCGCAAAG          |                    |                         |
|       |                               | MCP-specI465-F3   | GCTGTTGCAACCATTGAGA              | 415                |                         |
|       |                               | MCP-specI879-R3   | ACGGGGTGACTGAACCTG               |                    |                         |
| 3     | ISKNV ATPase gene             | ATP2DGf           | CACCACCTGTGTGTATTTGTC            | 1542               | Go et al., 2006         |
|       |                               | ATP1076DGIVlate r | ATGAACCCGCTGCACTATGC             |                    |                         |
| 4     | RSIV <i>psl</i> fragment      | 2F                | TACAACATGCTCCGCAAGA              | 564                | Kurita et al., 1998     |
|       |                               | 2R                | GCGTTAAAGTAGTGAGGGCA             |                    |                         |
| 5     | EHN V MCP gene                | M151              | AACCCGGCTTTCGGGCAGCA             | 321                | OIE EHN V, 2019         |
|       |                               | M152              | CGGGGCGGGGTTGATGAGAT             |                    |                         |
| 6     | SGIV DNA Pol gene             | SGIVDNPOLFW       | GTGTAYCAGTGGTTTTGCGAC            | 560                | Holopainen et al., 2009 |
|       |                               | SGIVDNPOLRE       | TCGTCTCCGGGYCTGTCTTT             |                    |                         |
| 7     | LCDV MCP gene                 | LCDVs F           | YTGGTTCAGTAAATTACCRG             | 609                | Kitamura et al. 2006    |
|       |                               | LCDVs R           | GTAATCCATACTTGHACRTC             |                    |                         |

535

536 **Legend to the figures:**

537 **Fig: 1a.** Samples amplified with C1105 and C1106 primers, with expected product sizes of  
538 431 bp. Lanes 1 and 2 represent fish samples, Lane 3 represents negative control; **1b.**  
539 Samples amplified with C1173 and C1174 primers; with expected product sizes of 167 bp.  
540 Lanes 1-5 represents fish samples, Lanes 7 represent negative control. M, 50 bp Ladder  
541 (Thermo Scientific).

542 **Fig: 2a.** Samples amplified with MCP-specI465-F3 and MCP-specI879-R3 primers, with  
543 expected product sizes of 415 bp. Lane 1 represents negative control and Lanes 2-15  
544 represents fish samples; **2b.** Samples amplified with ATP2DGf and ATP1076DGIVlater  
545 primers; with expected product sizes of 1542 bp. Lane 1-5 represents fish samples, Lanes 7  
546 represent negative control. M, 3 kb Ladder (Thermo Scientific).

547 **Fig: 3.** Nucleotide sequence alignments of primer sets C1105/C1106, C1073/C1074, C1105/  
548 MCP-uni1108-R8 and MCP-specI465-F3/MCP-specI879-R3 with major capsid protein  
549 (MCP) gene of infectious spleen and kidney necrosis virus (ISKNV) sequence of Indian  
550 isolate (accession: MK084827/MN518863), other published ISKNV isolates (accession:  
551 AF371960, MK757444, KY440040), red seabream iridovirus (RSIV) sequence (accession:  
552 AB666327) and turbot reddish body iridovirus (TRBIV) sequence (accession: HM596017).  
553 The nucleic acid variations are outlined in the ISKNV specific primer MCP-specI465-F3  
554 alignment. The alignment result was obtained by graphic view of BioEdit Sequence  
555 Alignment Editor.

556 **Fig: 4.** Amino acid alignment of MCP sequences (1-282) of different ISKNV isolates  
557 including India, RSIV and TRBIV isolates retrieve from NCBI. The amino acid variations are  
558 outlined. The alignment result is obtained by graphic view of Bio Edit Sequence Alignment  
559 Editor.



560 **Fig: 5.** Phylogenetic tree based on the MCP gene amino acid sequence of ISKNV, RSIV and  
561 TRBIV. The tree was generated by MEGA 6 using Maximum Likelihood method of Clustal  
562 W 2.1. MCP gene of human herpes virus was used as an outgroup.

563 **Supplementary Fig. 1.** Protein stability prediction of different ISKNV strain including  
564 Indian isolate. I-MUTANT 2.0 server was used to predict the stability of the protein  
565 sequences at pH 7.0 and temperature 25°C.

566 **Supplementary Fig. 2.** Protein stability prediction and comparison of stability upon mutation  
567 at pH 7.0 and temperature 25°C, among Indian ISKNV isolate with RSIV and TRBIV using  
568 I-MUTANT 2.0 server.

Fig: 1a

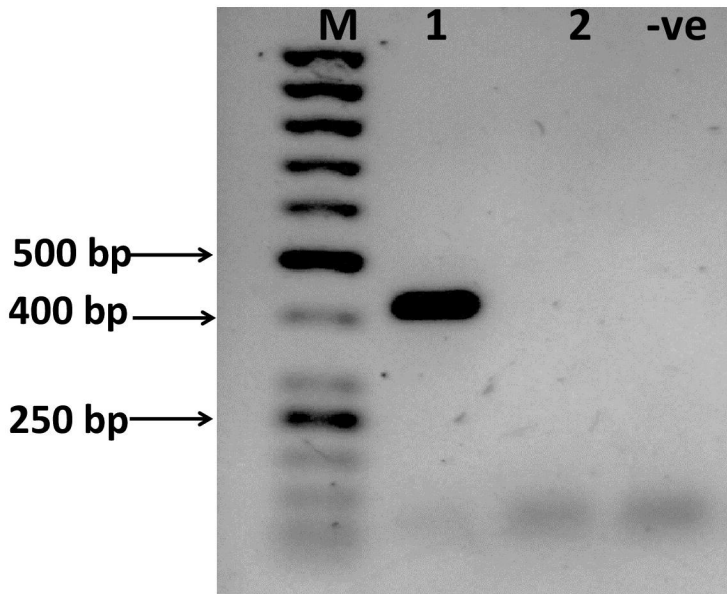

Fig: 1b

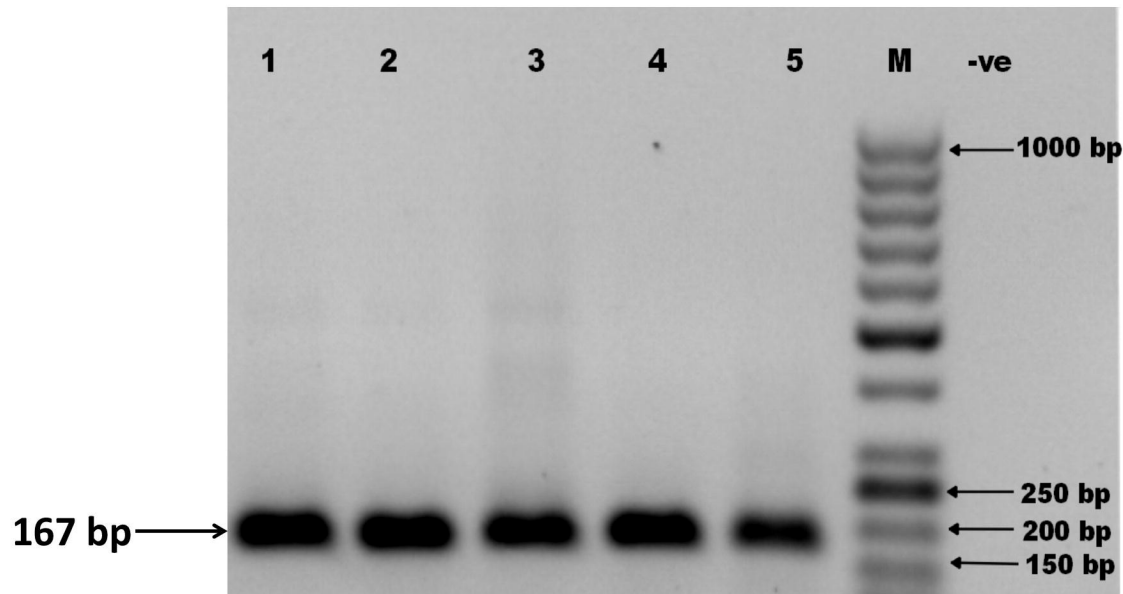

Fig: 2a

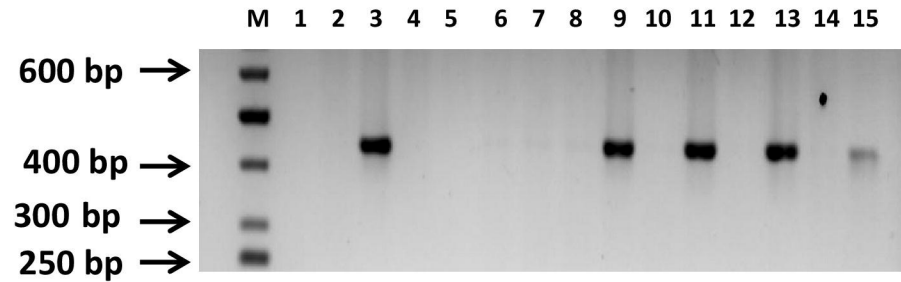

Fig: 2b

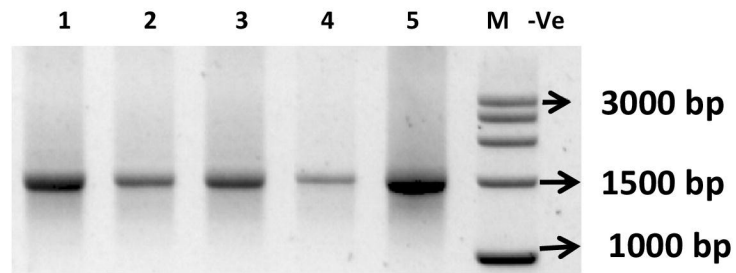

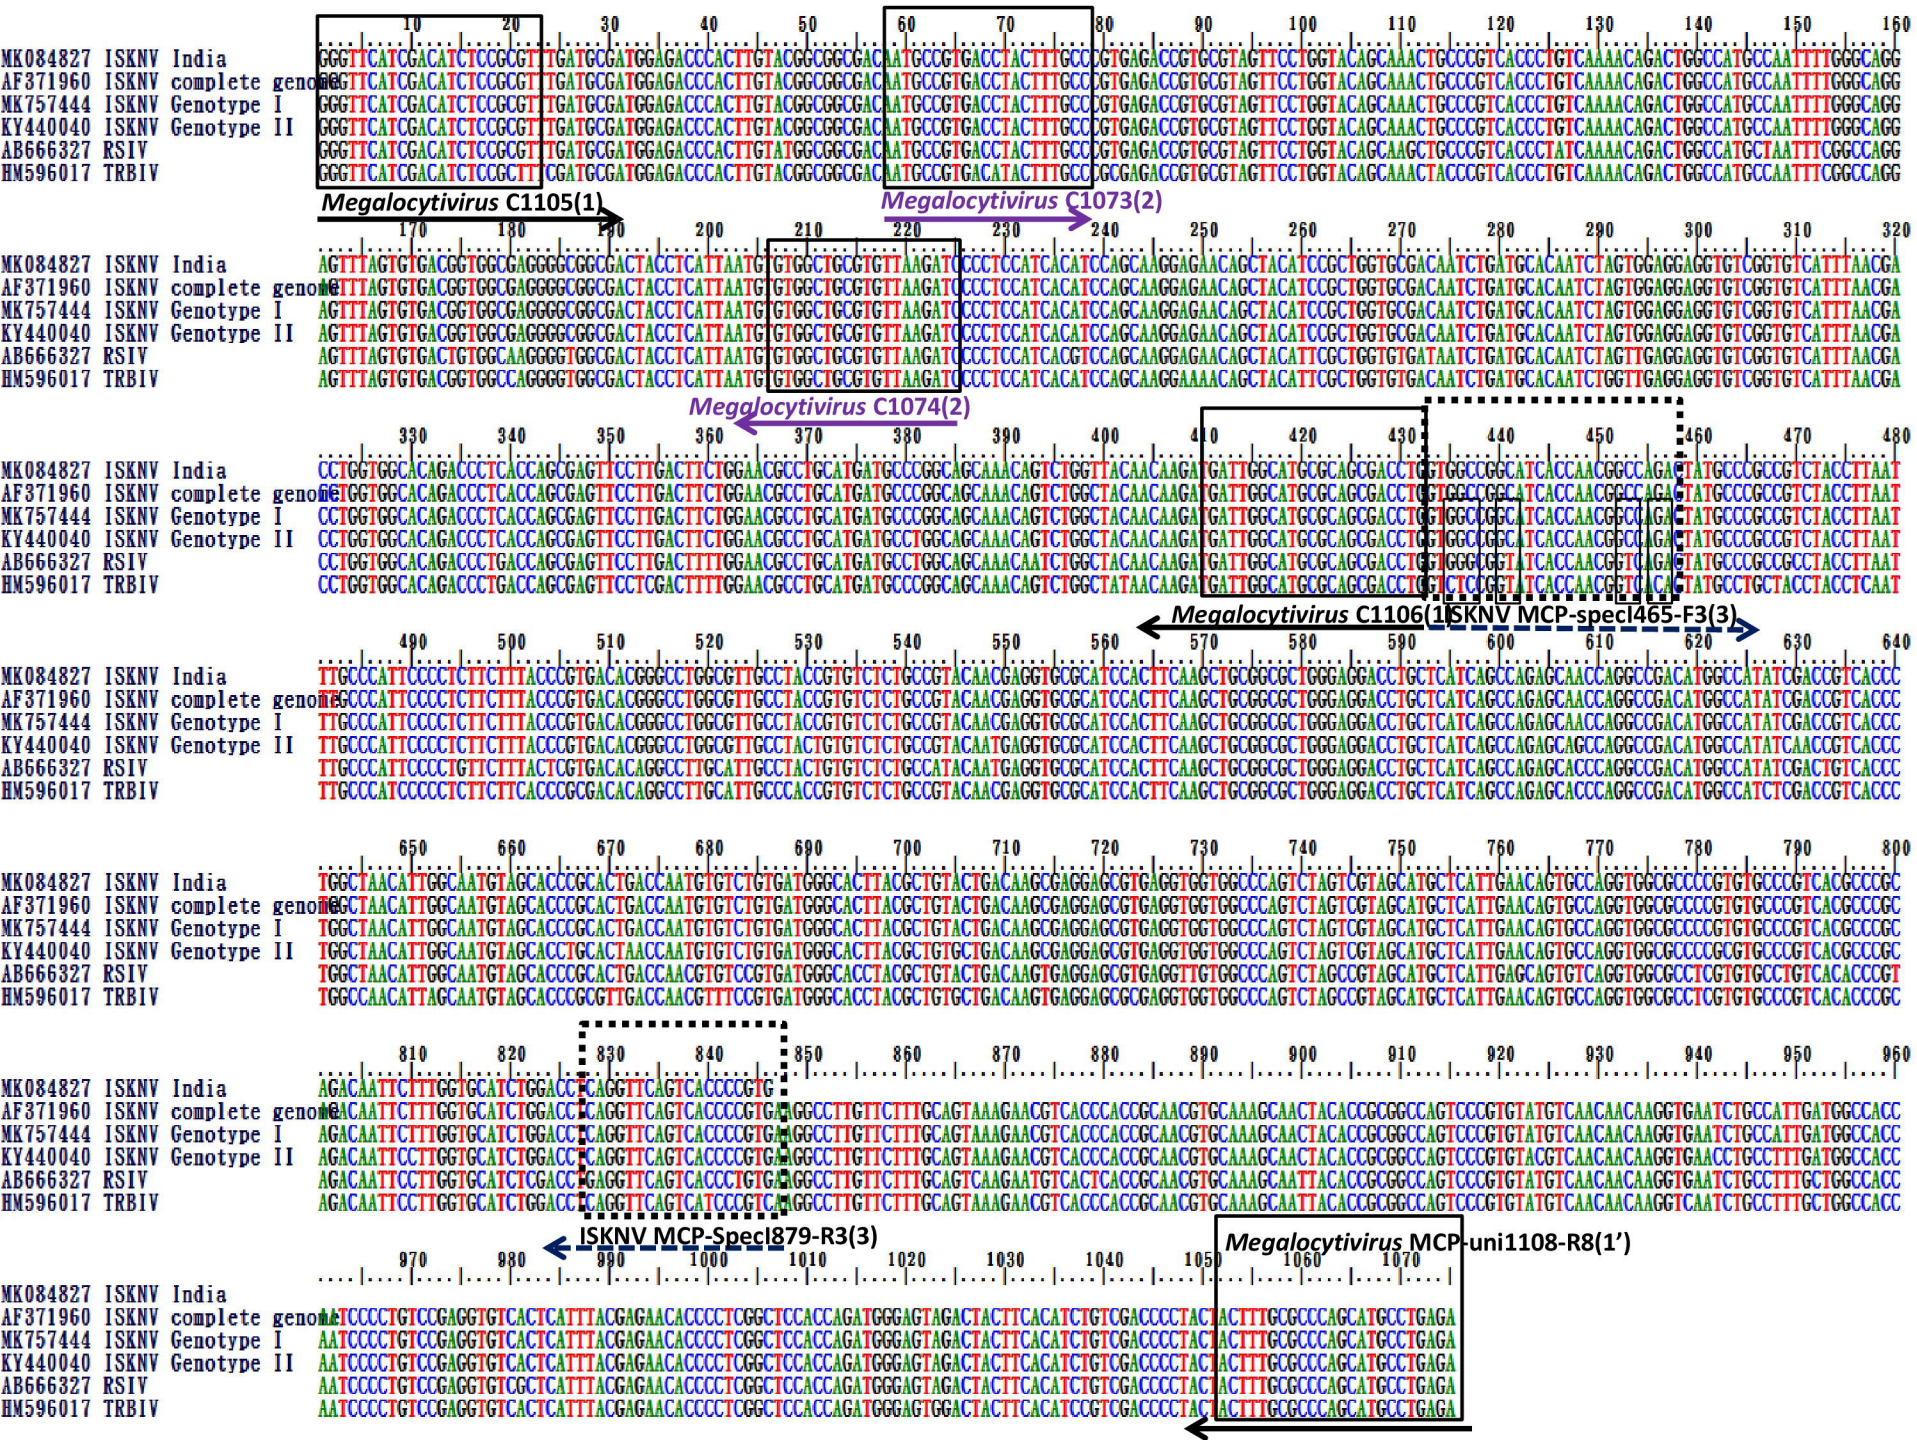

# Megalocytivirus MCP gene

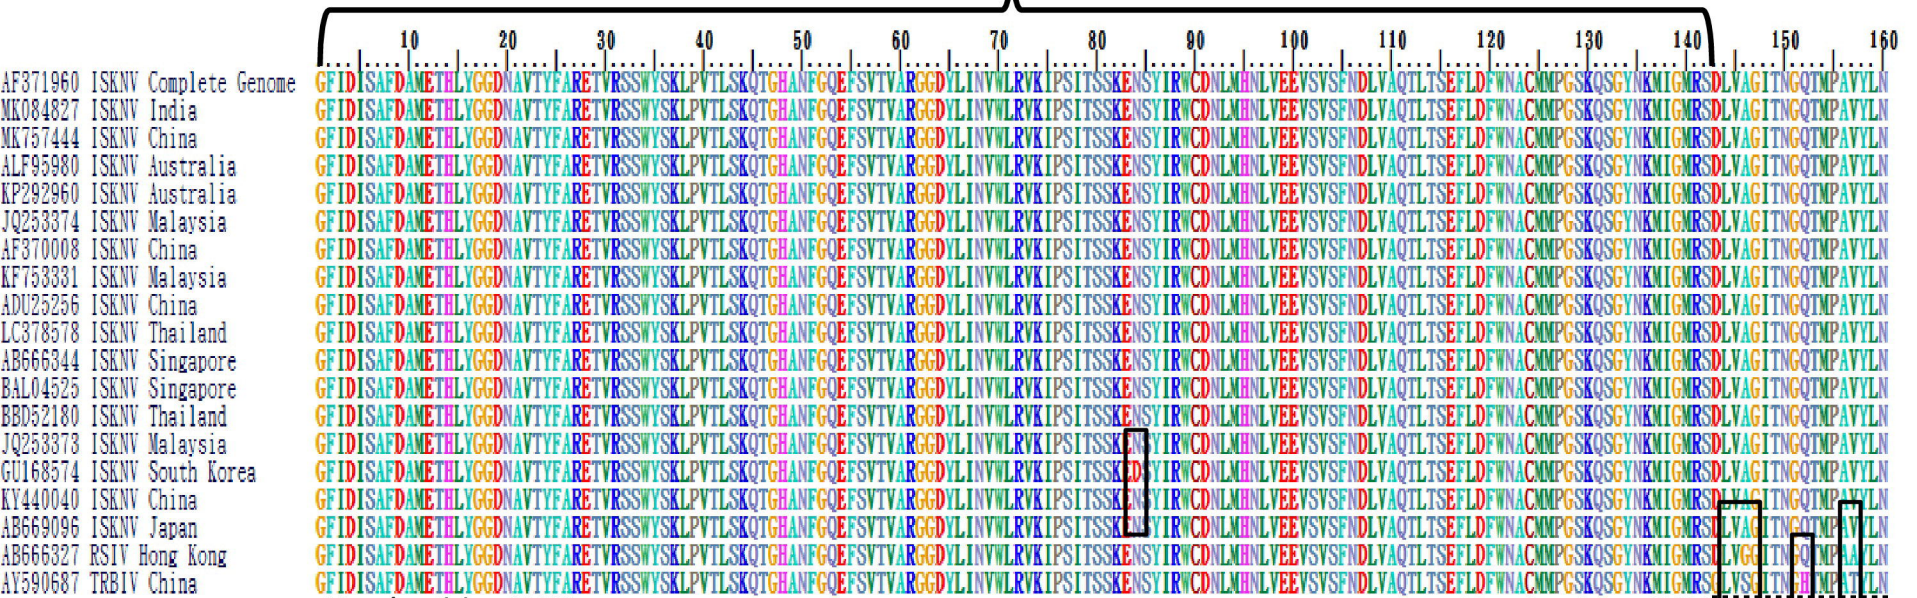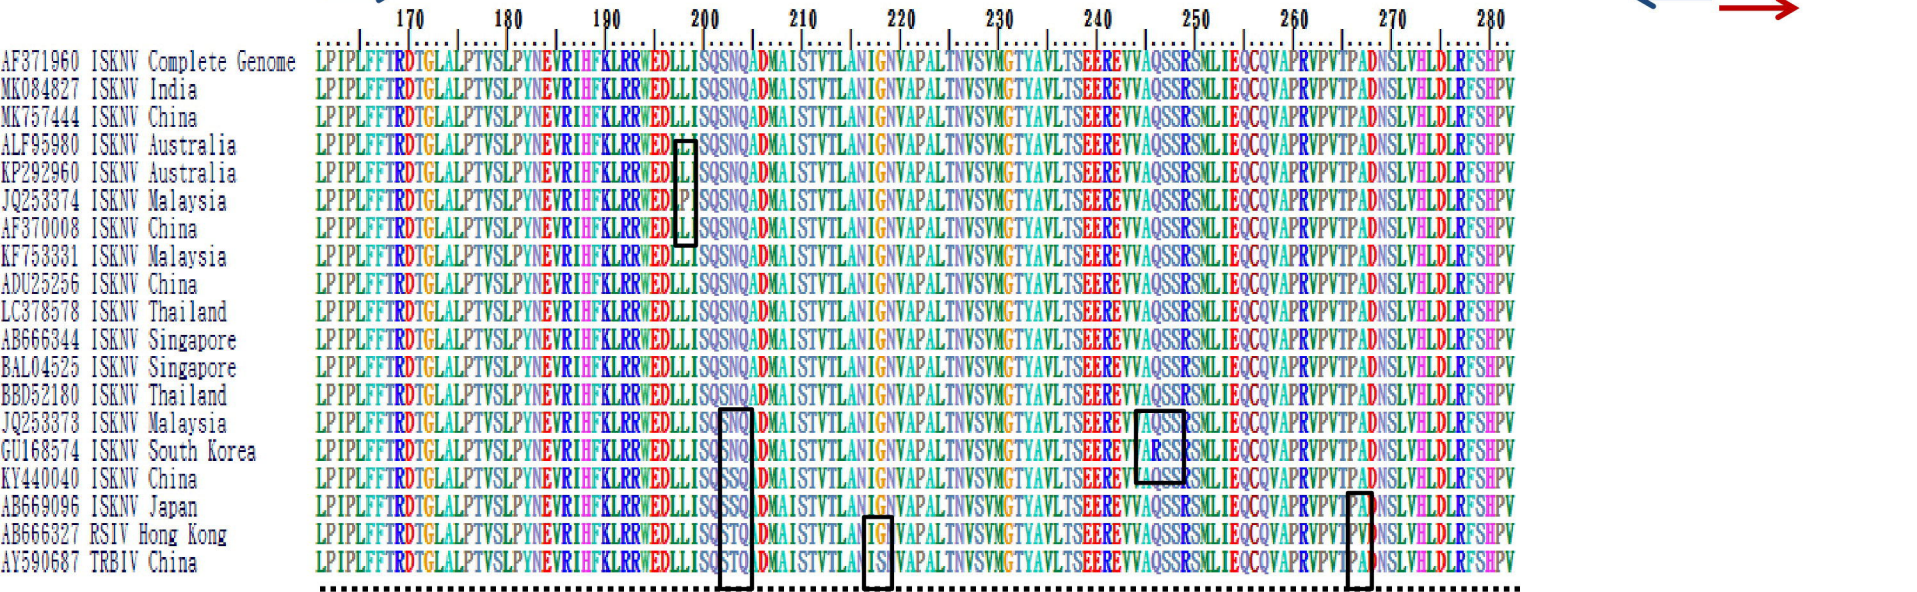

*BAL04525 ISKNV Singapore*  
*BBD52180 ISKNV Thailand*  
*AB666344 ISKNV Singapore*  
*ADU25256 ISKNV China*  
*KF753331 ISKNV Malaysia*  
*JQ253373 ISKNV Malaysia*  
*AF370008 ISKNV China*  
*KP292960 ISKNV Australia*  
*ALF95980 ISKNV Australia*  
*MK757444 ISKNV China*  
*AF371960 ISKNV Complete Genome*  
● *MK084827 ISKNV India*  
*LC378578 ISKNV Thailand*  
*JQ253374 ISKNV Malaysia*  
*GU168574 ISKNV South Korea*  
*KY440040 ISKNV China*  
*AB669096 ISKNV Japan*  
*AB666327 RSIV Hong Kong*  
*AY590687 TRBIV China*  
*D32005 Human herpesvirus MCP*

1
